# Supplementary material for: Chemiluminescence excited paper-based photoelectrochemical competitive immunosensing based on porous ZnO spheres and CdS nanorods
Source: Royal Society of Chemistry journal article supplement (doi:10.1039/c4tb01119h), 2014-08-15
Supplement: c4tb01119h1.pdf [file c4tb01119h1.pdf]

1 **Chemiluminescence excited paper-based photoelectrochemical**  
2 **competitive immunosensing based on porous ZnO spheres and**  
3 **CdS nanorods**

4

5 **Guoqiang Sun <sup>a</sup>, Yan Zhang <sup>a</sup>, Qingkun Kong <sup>a</sup>, Chao Ma <sup>a</sup>, Jinghua Yu <sup>a</sup>,**

6 **Shenguang Ge <sup>b</sup>, Mei Yan <sup>\*a</sup> and Xianrang Song <sup>c</sup>**

7

8

9 *<sup>a</sup> Key Laboratory of Chemical Sensing & Analysis in Universities of Shandong,*  
10 *School of Chemistry and Chemical Engineering, University of Jinan, Jinan 250022,*  
11 *P. R. China.*

12 *<sup>b</sup> Shandong Provincial Key Laboratory of Preparation and Measurement of Building*  
13 *Materials, University of Jinan, Jinan 250022, China.*

14 *<sup>c</sup> Cancer Research Center, Shandong Tumor Hospital, Jinan 250012, P.R. China*

15

16

17

18

19

20

21 *\*Corresponding author: Mei Yan*

22 *E-mail: chm\_yanm@126.com*

23 *Telephone: +86-531-82767161*

## 25 **Preparation of porous ZnO spheres and CdS NRs**

26 The porous ZnO spheres were prepared according to the as reported literature.<sup>1</sup>  
27 Typically, 5 g of soluble starch was dissolved in 150 mL of boiling ultrapure water.  
28 Then, 0.01 mol of  $\text{Zn}(\text{NO}_3)_2 \cdot 6\text{H}_2\text{O}$  was added and the mixture was stirred at 85 °C for  
29 5 min. After adjusting the pH of the mixture solution to 8-9 with ammonium  
30 hydroxide, the solution was stirred for an additional 30 min at 85 °C. Subsequently,  
31 the resulting precipitate was centrifuged, washed with ultrapure water, and dried at 50  
32 °C. Then, the as-obtained powders were calcined in air atmosphere at 500 °C for 2 h  
33 to obtain porous ZnO spheres.

34 The CdS NRs were synthesized via a facile solvent hydrothermal process. In a  
35 typical procedure, 1 mM cadmium chloride and 3 mM L-cysteine were dissolved into  
36 4 mL of water to form a homogeneous solution by constant vigorous stirring. Then,  
37 30 mL of ethylenediamine was added into the above mixture and continually stirred  
38 for 30 min. The resulting mixture was transferred into a Teflon-lined stainless-steel  
39 autoclave and heated at 180 °C for 24 h. The system was then allowed to cool to room  
40 temperature and the precipitation was collected and washed with water and absolute  
41 alcohol several times, CdS NRs were obtained and then dried under vacuum for  
42 further use.

## 43 **Structure characterization**

44 As shown in Fig. S1A, a continuous and dense conducting AuNPs layer with  
45 interconnected AuNPs was obtained completely on the cellulose fiber surfaces. The  
46 diameters of the as-synthesized ZnO spheres were about 300-500 nm (Fig. S1B). The  
47 TEM image of ZnO was shown in Fig. S1C, the prepared ZnO spheres were with  
48 rough surface. Obvious pores could be seen in ZnO, and this porous structure  
49 improved the immobilized amount of PSA. With the aid of PATP molecules, ZnO

50 spheres were attached onto Au-PWE (Fig. S1D) and the corresponding EDS spectrum  
51 was shown in Fig. S1E, which indicated that the ZnO was successfully immobilized  
52 on Au-PWE.

53 The XRD patterns of bare PWE, Au-PWE, ZnO/Au-PWE and porous ZnO  
54 spheres were shown in Fig. S1F. In contrast to the XRD pattern of bare PWE, three  
55 distinct diffraction peaks were observed in the XRD pattern of Au-PWE. The peaks at  
56  $2\theta = 38.36, 44.54$  and  $64.75^\circ$  were indexed to the (111), (200) and (220)  
57 crystallographic planes of cubic AuNPs, respectively (JCPDS card No 004-0784),  
58 suggesting that AuNPs had been successfully deposited on paper. The diffraction  
59 peaks in the range of  $20^\circ < 2\theta < 70^\circ$  could be indexed as (100), (002), (101), (102),  
60 (110), (103), (200), (112), (201) planes of hexagonal phase ZnO, which were  
61 consistent with the value in the standard card (JCPDS 89-7102). The XRD pattern of  
62 ZnO/Au-PWE contained the diffraction peaks of Au-PWE and porous ZnO spheres,  
63 indicating that the ZnO/Au-PWE was successfully synthesized.

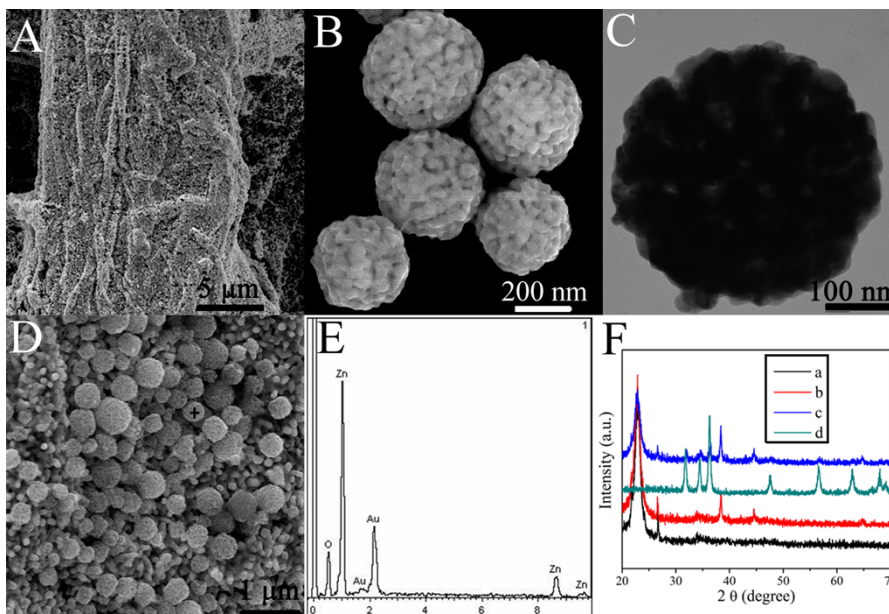

64

65 **Fig. S1.** SEM images of (A) Au-PWE and (B) porous ZnO spheres. (C) TEM image of ZnO. (D) SEM image of  
66 ZnO/Au-PWE. (E) EDS of ZnO/Au-PWE. (F) XRD patterns of the (a) bare paper, (b) Au-PWE, (c) ZnO/Au-PWE,  
67 (d) porous ZnO spheres.

68 The structure of the synthesized CdS NRs could be verified by morphological  
69 analyses. The SEM image of the CdS NRs was shown in Fig. S2A and the rod-like  
70 nanostructures of CdS with lengths about of 200 nm. The corresponding EDS  
71 spectrum of the CdS NRs was observed in Fig. S2B, the S/Cd atomic ratio was  
72 0.94:1.0, in agreement with the stoichiometric composition of CdS. The CdS NRs-  
73 Ab-HRP bioconjugates were characterized using UV-vis spectroscopy (Fig. S2C). A  
74 broad absorption peak in visible light region was observed for the synthesized CdS  
75 NRs (curve a). After the immobilization of HRP-Ab, one adsorption peak from CdS  
76 NRs was observed at around 488 nm, and another distinct adsorption peak from the  
77 HRP-Ab was observed on the spectra of CdS NRs-Ab-HRP bio-conjugates (curve b),  
78 which was attributed to the adsorption peak from the HRP-Ab itself at 280 nm (curve  
79 c).

80 The XRD pattern of the as-synthesized CdS NRs was shown in Fig. S2D. The  
81 XRD pattern of CdS NRs could be ascribed to the stable hexagonal phase CdS  
82 (JCPDS No. 41-1049). The peaks at  $2\theta$  values of 24.86, 26.6, 28.24, 36.68, 43.8, 48.1,  
83 50.9, 51.9, 52.9, 66.9 and 69.5° for CdS NRs were indexed to the (100), (002), (101),  
84 (102), (110), (103), (200), (112), (201), (203) and (210) crystal planes of wurtzite  
85 structure CdS with a hexagonal phase, respectively. No peaks of impurities were  
86 detected, revealing the high purity of the as-synthesized products. The FT-IR spectra  
87 of CdS NRs was shown in Fig. S2E, a strong absorption peak was observed at 3434  
88  $\text{cm}^{-1}$ , which could be attributed to the characteristic stretching vibration of  $-\text{NH}_2$   
89 group. Thus, HRP-Ab could connect to CdS NRs with the aid of GA cross-linking.  
90 The characteristic band at 1635  $\text{cm}^{-1}$  was assigned to the flexural vibration of N-H.  
91 The peak at 581  $\text{cm}^{-1}$  was attributed to the Cd-S stretching mode.<sup>2</sup>

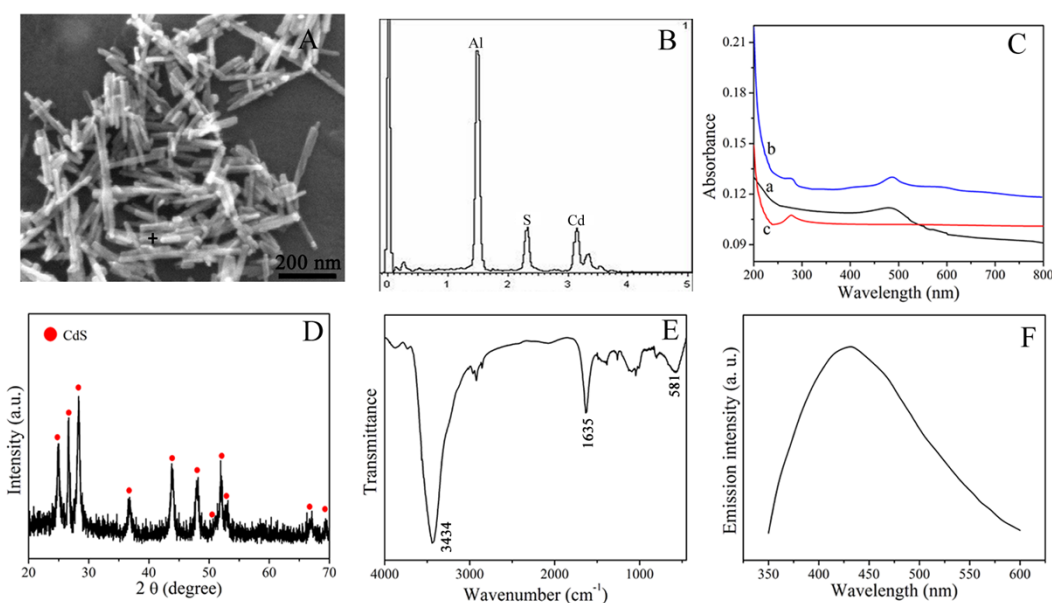

92

93 **Fig. S2.** (A) SEM image of CdS NRs. (B) EDS of the CdS NRs. (C) UV-vis absorption spectrum of (a) CdS NRs,  
 94 (b) CdS NRs-Ab-HRP, (c) HRP-Ab. (D) XRD patterns of CdS NRs. (E) FT-IR spectra of CdS NRs. (F) CL  
 95 spectrum of luminol-H<sub>2</sub>O<sub>2</sub>-HRP-PIP system.

## 96 Optimization of experimental conditions

97 A series of experiments were conducted to select optimal analytical conditions using 1  
 98 ng mL<sup>-1</sup> PSA. H<sub>2</sub>O<sub>2</sub> was not only used as the oxidant in the luminol-H<sub>2</sub>O<sub>2</sub>-HRP-PIP  
 99 CL system, but also as the electron donors to suppress the corrosion of CdS under  
 100 illumination as well as to facilitate the generation of stable photocurrent. At lower  
 101 H<sub>2</sub>O<sub>2</sub> concentration the photocurrent responses were improved with the increase of  
 102 H<sub>2</sub>O<sub>2</sub> concentration (Fig. S3A). When the concentration of the H<sub>2</sub>O<sub>2</sub> solution was  
 103 higher than 5 mM, the photocurrent intensity decreased since the oxidation of the CdS  
 104 by excess H<sub>2</sub>O<sub>2</sub> that yielded surface defects and traps. Thus, 5 mM H<sub>2</sub>O<sub>2</sub> was used in  
 105 the experiments.

106 As shown in Fig. S3B, the photocurrent responses increased with increasing  
 107 temperature up to 37 °C, which was attributed to the increasing immunoreaction rate  
 108 between PSA and CdS NRs-Ab-HRP bioconjugate. However, when temperature was  
 109 over 37 °C, the photocurrent response decreased. This was attributed to high

110 temperature caused an irreversible denaturation of proteins. Consequently, 37 °C was  
111 employed as the optimal incubation temperature for the PEC biosensing.

112 Fig. S3C showed the incubation time on the responses of the PEC biosensor. At  
113 the optimized incubation temperature, the photocurrent responses increased with  
114 incubation time and reached a plateau at 25 min. Longer incubation time did not  
115 obviously improve the response, forecasting the equilibrium of immune reaction.  
116 Therefore, 25 min was accepted as the optimal incubation time.

117 The applied potential was an important parameter for producing the photocurrent.  
118 As shown in Fig. S3D, in the potential range from 0 to 0.4 V, the photocurrent  
119 increased slowly and trended a relatively stable value. However, the photocurrent at 0  
120 V was 85.2% of that at +0.4 V, showing enough sensitivity for PEC detection of PSA.  
121 Meanwhile, the low applied potential was beneficial to the elimination of interference  
122 from other reductive species that coexisted in the real samples. Thus, 0 V was selected  
123 as the applied potential for the determination of PSA.

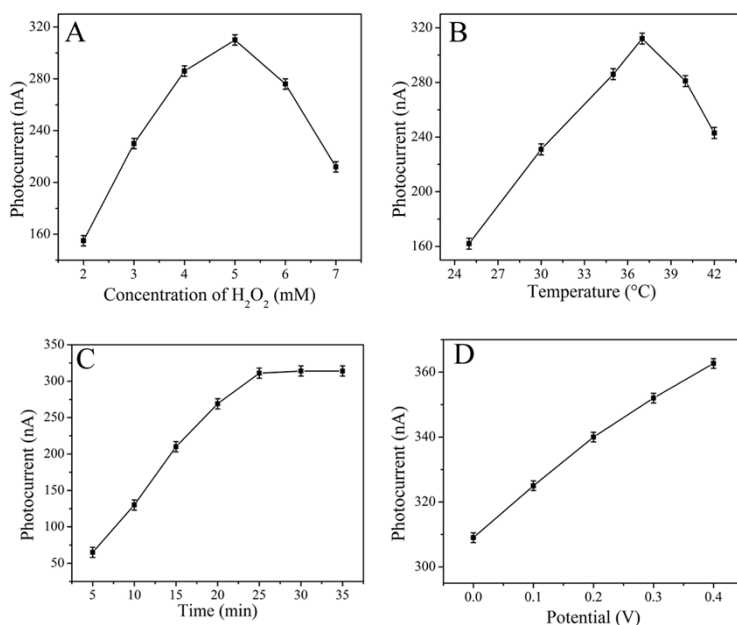

124  
125  
126  
127  
128

**Fig. S3.** The effect of (A) concentration of H<sub>2</sub>O<sub>2</sub>; (B) incubation temperature; (C) incubation time and (D) potential on photocurrent with 1 ng mL<sup>-1</sup> PSA.

129 **References**

- 130 1 G. K. Zhang, X. Shen and Y. Q. Yang, *J. Phys. Chem. C*, 2011, **115**, 7145-7152.  
131 2 G. Geindy, M. Mohamed and A. Mohamed, *Turk. J. Chem.*, 2006, **30**, 361-382.
